# Supplementary material for: ESM1 Interacts with c-Met to Promote Gastric Cancer Peritoneal Metastasis by Inducing Angiogenesis
Source: MDPI journal article supplement (doi:10.3390/cancers16010194), 2023-12-30
Supplement: s1 [file s1]

**Supplementary Table S1: primer sequences used in the study**

|               |                                                          |
|---------------|----------------------------------------------------------|
| <i>ESM1</i>   | F: AGCAATAATTATGCGGTGGACT<br>R: ACCAAACTCGTCACCAAAGGA    |
| <i>Ang-1</i>  | F: GCAACTGGAGCTGATGGACA<br>R: GCTCCCTTTAGTAAAAACACCTTCT  |
| <i>Ang-2</i>  | F: ACTCAGCTAAGGACCCCACT<br>R: AGATGCCATTCTGTGGTGTGT      |
| <i>VEGFA</i>  | F: CGGAGCCGCGAGAAAGTGCTA<br>R: CCTCACCCGTCCATGAGCCC      |
| <i>FGF2</i>   | F: ATGGCTCCCTTAGCCGAAGT<br>R: AGGAAATGCGAACCCACCTG       |
| <i>MMP9</i>   | F: GGGACGCAGACATCGTCATC<br>R: TCGTCATCGTCGAAATGGGC       |
| <i>MMP1</i>   | F: ATGAAGCAGCCAGATGTGGAG<br>R: TGGTCCACATCTGCTCTTGGCA    |
| <i>CXCL5</i>  | F: AGCTGCGTTGCGTTTGTTTAC<br>R: TGGCGAACACTTGCAGATTAC     |
| <i>CCL1</i>   | F: ACTGATGTGCCTGCTGCTGG<br>R: TGGGGGATCAGGACAGGAGG       |
| <i>TGFB1</i>  | F: ATGGAGAGAGGACTGCGGAT<br>R: TAGTGTTCCCCACTGGTCCC       |
| <i>IL6</i>    | F: GGAGACTTCACAGAGGATAC<br>R: GCATCATCGTTGTTCATACA       |
| <i>TNF</i>    | F: GAAAGCATGATCCGGGACGTG<br>R: GATGGCAGAGAGGAGGTTGAC     |
| <i>FLT4</i>   | F: TGGAGTTTCTGGCATCTCGT<br>R: ACCATCCCCTGTCTGTCTG        |
| <i>PECAM1</i> | F: ACATAACAGAGCTGTTTCCCA<br>R: AGGACAGGTCCAACAACCTC      |
| <i>VEGFD</i>  | F: ATCTGTATGAACACCAGCACCTC<br>R: TGGCAACTTTAACAGGCACTAAT |
| <i>IL2</i>    | F: GCAGGATGGAGAATTACAGGAA<br>R: GCAGAGGTCCAAGTTCATCTTC   |
| <i>IL4</i>    | F: TGCCTCCAAGAACACAACCTG<br>R: GTCCTTCTCATGGTGGCTGT      |
| <i>EGF</i>    | F: TGTCCACGCAATGTGTCTGAA<br>R: CATTATCGGGTGAGGAACAACC    |
| <i>c-Met</i>  | F: AGCGTCAACAGA GGGACCT<br>R: AGCGTCAACAGAGGGACCT        |
| <i>GAPDH</i>  | F: CTCTGCTCCTCCTGTTTCGAC<br>R: GCGCCCAATACGACCAAATC      |

**Supplementary Table S2: Summary of ESM1 expression with clinicopathologic features of gastric cancer**

| Variables                 | Cases<br>(n) | ESM1 expression |         | P Value |
|---------------------------|--------------|-----------------|---------|---------|
|                           |              | Low 93          | High 87 |         |
| <b>Age</b>                |              |                 |         |         |
| ≤60                       | 61           | 31              | 30      | 0.8707  |
| >60                       | 119          | 62              | 57      |         |
| <b>Gender</b>             |              |                 |         |         |
| Male                      | 113          | 52              | 51      | 0.7074  |
| Female                    | 67           | 41              | 36      |         |
| <b>Tumor size(cm)</b>     |              |                 |         |         |
| <3.5                      | 91           | 51              | 40      | 0.2106  |
| ≥3.5                      | 89           | 42              | 47      |         |
| <b>T Stage</b>            |              |                 |         |         |
| T1+T2                     | 55           | 36              | 19      | 0.0141* |
| T3+T4                     | 125          | 57              | 68      |         |
| <b>N Stage</b>            |              |                 |         |         |
| N0+N1                     | 52           | 32              | 20      | 0.0912  |
| N2+N3                     | 128          | 61              | 67      |         |
| <b>M Stage</b>            |              |                 |         |         |
| Negative                  | 156          | 86              | 70      | 0.0756  |
| Positive                  | 24           | 7               | 17      |         |
| <b>Venous invasion</b>    |              |                 |         |         |
| Absence                   | 84           | 50              | 34      | 0.0150* |
| Presence                  | 106          | 43              | 53      |         |
| <b>Distant metastasis</b> |              |                 |         |         |
| Negative                  | 167          | 93              | 74      | 0.0407* |
| Positive                  | 13           | 0               | 13      |         |

\*<0.05
