# Supplementary material for: ESM1 Interacts with c-Met to Promote Gastric Cancer Peritoneal Metastasis by Inducing Angiogenesis
Source: MDPI journal article supplement (doi:10.3390/cancers16010194), 2023-12-30
Supplement: s1 [file s1]

Supplementary data

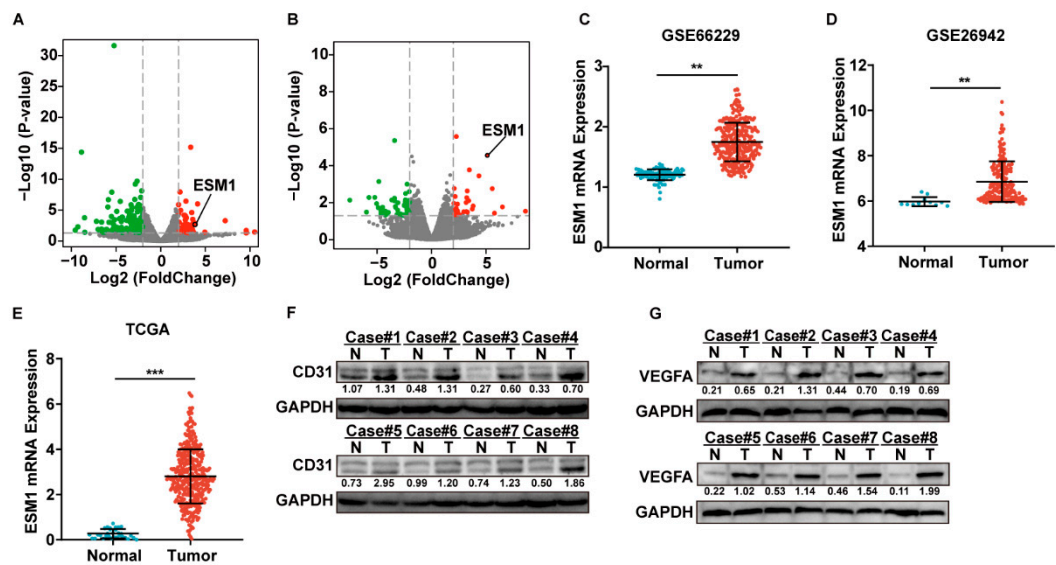

**Figure S1.** Volcano plots with differentially expressed genes in primary GC (**A**) and metastatic GC (**B**) vs. adjacent normal tissues. **C-E** Higher expression of ESM1 was found in GC samples than the matched normal tissues (based on GSE66229, GSE26942 and TCGA database). **F** and **G** Western blot analysis was performed in 8 pairs of GC patient samples using antibodies against CD31 and VEGFA.

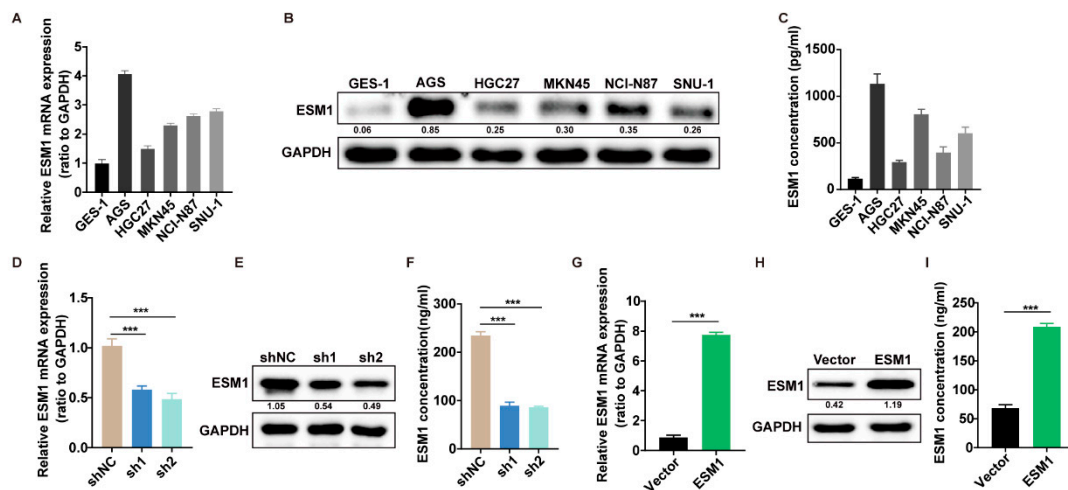

**Figure S2.** **A, B** RT-qPCR and Western blot analysis showing the expression of ESM1 in different GC cell lines. Total GAPDH was used as a loading control. **C** ELISA showing the concentration of ESM1 in GC cells supernatant. **D-I** RT-qPCR and Western blot analysis of AGS and HGC27 stably transfected with ESM1 knockdown/overexpression lentiviruses and control lentiviruses. Total GAPDH was used as a loading control.

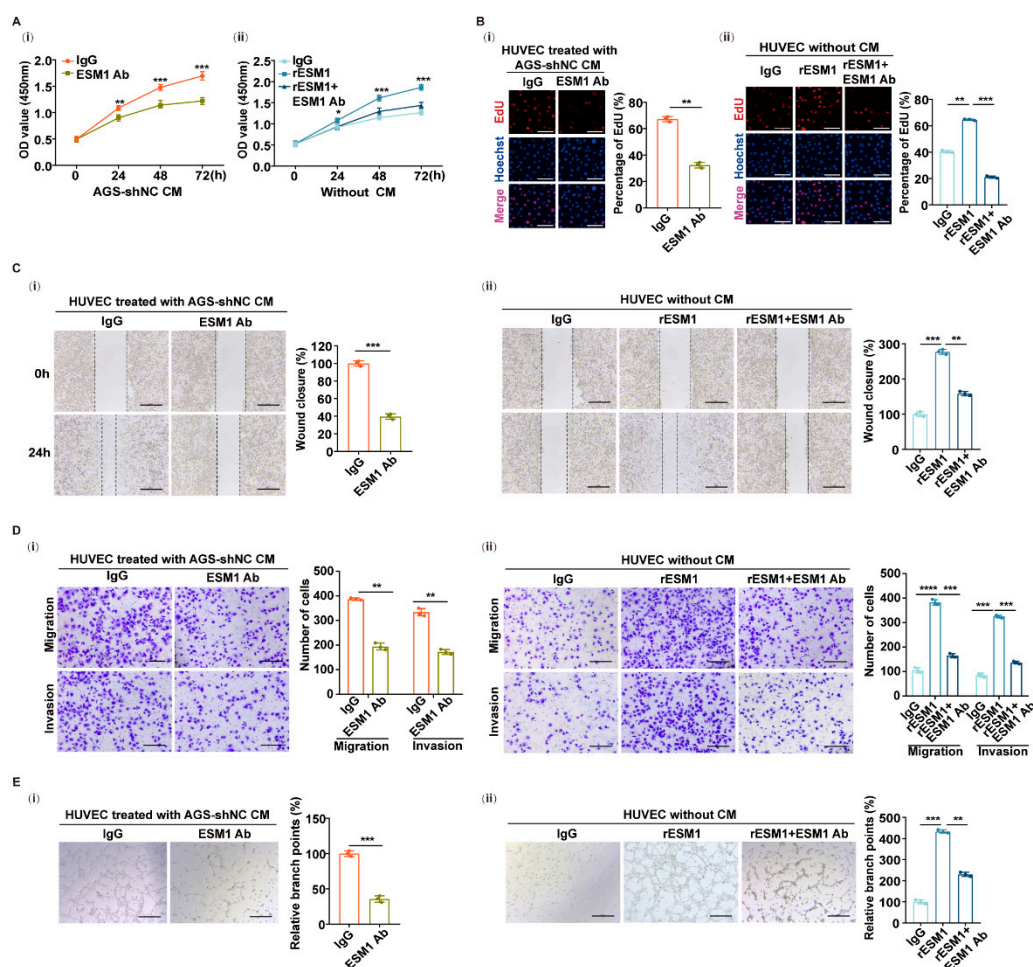

**Figure S3. A (i)** CCK8 assay analyzed the proliferation of HUVEC treated with CM of AGS-shNC with ESM1 Ab and **(ii)** ECM with recombinant ESM1 or neutralizing antibody against ESM1, and IgG was used as a control. Data are shown as the mean  $\pm$  SD of triplicate independent sets of experiments; statistical significance was assessed by paired t-test, \* $<0.05$ , \*\* $<0.01$ , \*\*\* $<0.001$ . **B (i)** EDU assay analyzed the proliferation of HUVEC treated with CM of AGS-shNC with ESM1 Ab and **(ii)** ECM with recombinant ESM1 or neutralizing antibody against ESM1, and IgG was used as a control. Representative images (left panel) and quantification (right panel) are shown as indicated. Data from independent experiments are presented as the mean  $\pm$  SD. Statistical significance was assessed by an unpaired t-test.

$** < 0.01$ ,  $***p < 0.001$ . Scale bar: 50um. **C (i)** Wound healing assay analyzed the migration of HUVEC treated with CM of AGS-shNC with ESM1 Ab and **(ii)** ECM with recombinant ESM1 or neutralizing antibody against ESM1 at 0 and 24h, and IgG was used as a control. Representative images (left panel) and quantification (right panel) are shown as indicated. Data from independent experiments are presented as the mean  $\pm$  SD. Statistical significance was assessed by an unpaired t-test.  $** < 0.01$ ,  $***p < 0.001$ . Scale bar: 100um. **D** Transwell migration and Matrigel invasion assays were performed to assess migration and invasion ability of HUVEC treated with CM of AGS-shNC with ESM1 Ab and **(ii)** ECM with recombinant ESM1 or neutralizing antibody against ESM1, and IgG was used as a control. Representative images (left panel) and quantification (right panel) are shown as indicated. Data from independent experiments are presented as the mean  $\pm$  SD. Statistical significance was assessed by an unpaired t-test.  $** < 0.01$ ,  $***p < 0.001$ . Scale bar: 50um. **E** Tube formation assay were performed to assess Tube forming ability of HUVEC treated with CM of AGS-shNC with ESM1 Ab **(i)** and **(ii)** ECM with recombinant ESM1 or neutralizing antibody against ESM1, and IgG was used as a control. Representative images (left panel) and quantification (right panel) are shown as indicated. Data from independent experiments are presented as the mean  $\pm$  SD. Statistical significance was assessed by an unpaired t-test.  $** < 0.01$ ,  $***p < 0.001$ . Scale bar: 200um.

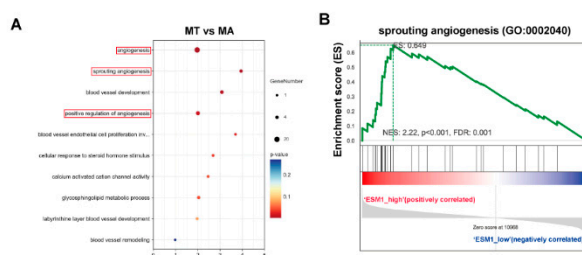

**Figure S4.** GO **(A)** and GSEA **(B)** analysis of our previous transcriptome sequencing data enriched angiogenesis.

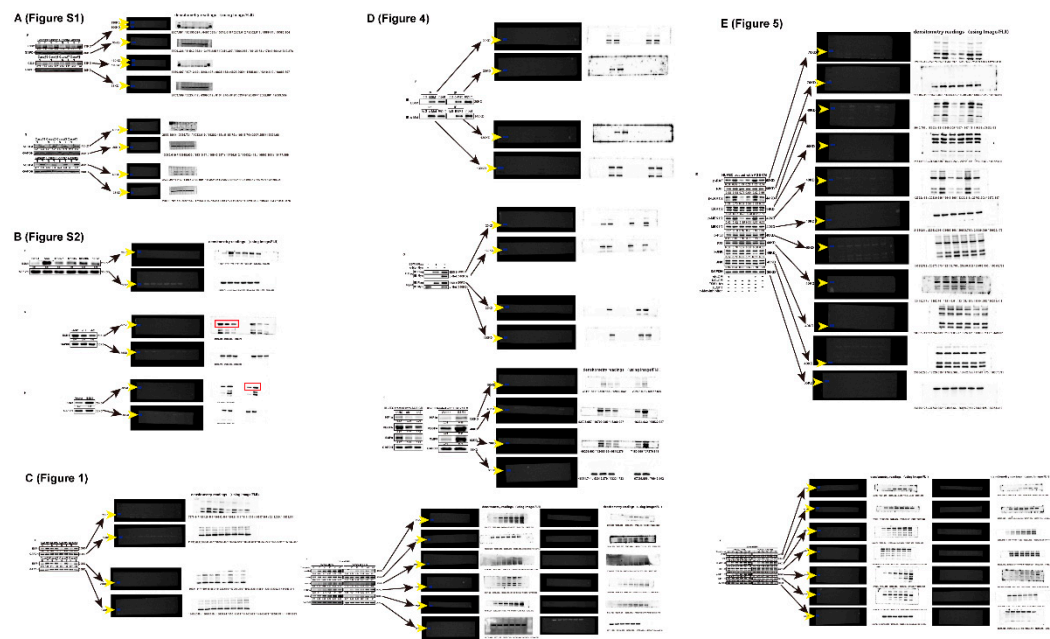

**Figure S5.** Uncropped western blots cited in Figures.
